# Supplementary material for: Flow Cytometric Features of B- and T-Lmphocytes in Reactive Lymph Nodes Compared to Their Neoplastic Counterparts in Dogs
Source: MDPI journal article supplement (doi:10.3390/vetsci10060374), 2023-05-26
Supplement: s1 [file s1]

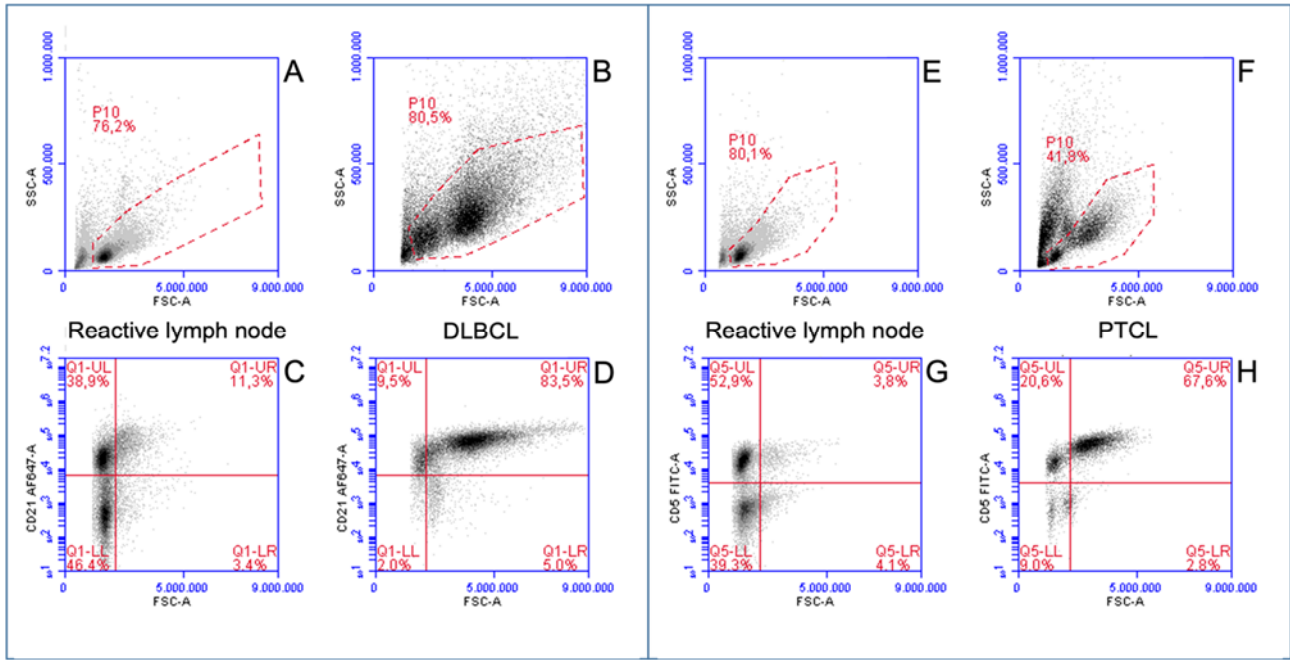

**Figure S3.** Discrimination between small and large cell populations in reactive lymph nodes (A, C, E, G) and lymphomas (B, D, F, H). (A, B, E, F) FSC vs SSC plot showing whole population after doublets exclusion. (C, D, G, H) P10 events of the above plots are displayed. While in reactive lymph nodes there is often continuum between the small and large cells (A, E) in lymphomas they are more clearly separated (B, F). The discrimination between the two populations is made easier by using CD21 (C, D) or CD5 expression (G, H). DLBCL=Diffuse Large B-Cell Lymphoma; PTCL: Peripheral T-Cell Lymphoma.
