# Supplementary material for: Flow Cytometric Features of B- and T-Lmphocytes in Reactive Lymph Nodes Compared to Their Neoplastic Counterparts in Dogs
Source: MDPI journal article supplement (doi:10.3390/vetsci10060374), 2023-05-26
Supplement: s1 [file s1]

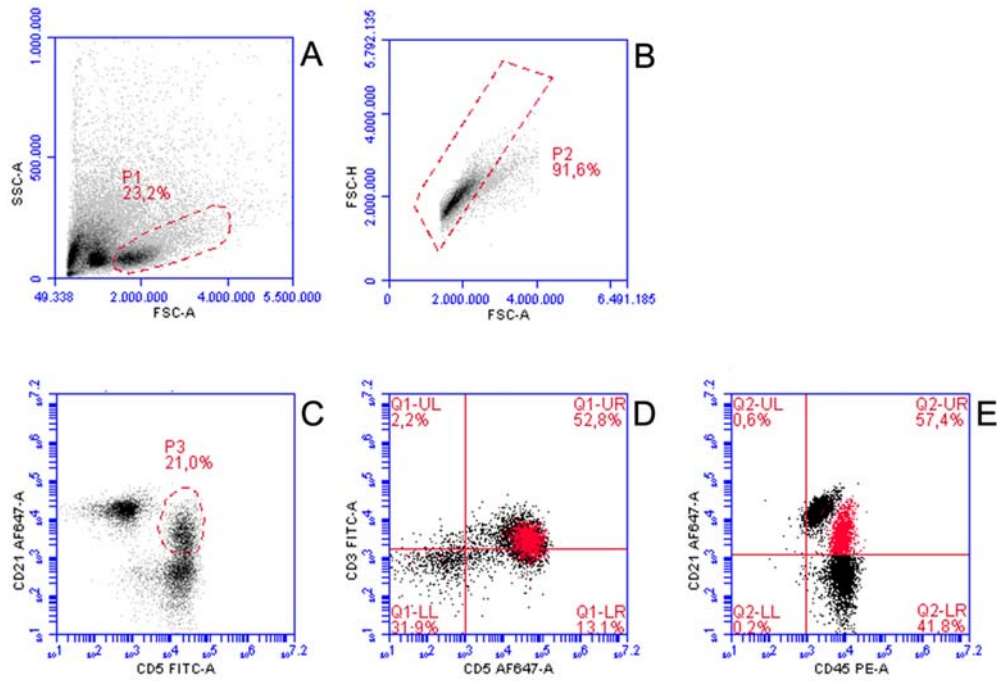

**Figure S2.** Reactive lymph node. (A) All events are displayed; a gate (P1) was set on FSC versus SSC scattergram to exclude platelets and debris. (B) P1 events are displayed; a second gate (P2) was set on FSC-H versus FSC-A scattergram to exclude doublets. (C) P2 events are displayed; a gate was set to highlight CD5+CD21+ events (P3). (D,E) P3 events are displayed; CD5+CD21+ cells (red dots) are CD3+ (D) and CD45+ (E).
