# Supplementary material for: Flow Cytometric Features of B- and T-Lmphocytes in Reactive Lymph Nodes Compared to Their Neoplastic Counterparts in Dogs
Source: MDPI journal article supplement (doi:10.3390/vetsci10060374), 2023-05-26
Supplement: s1 [file s1]

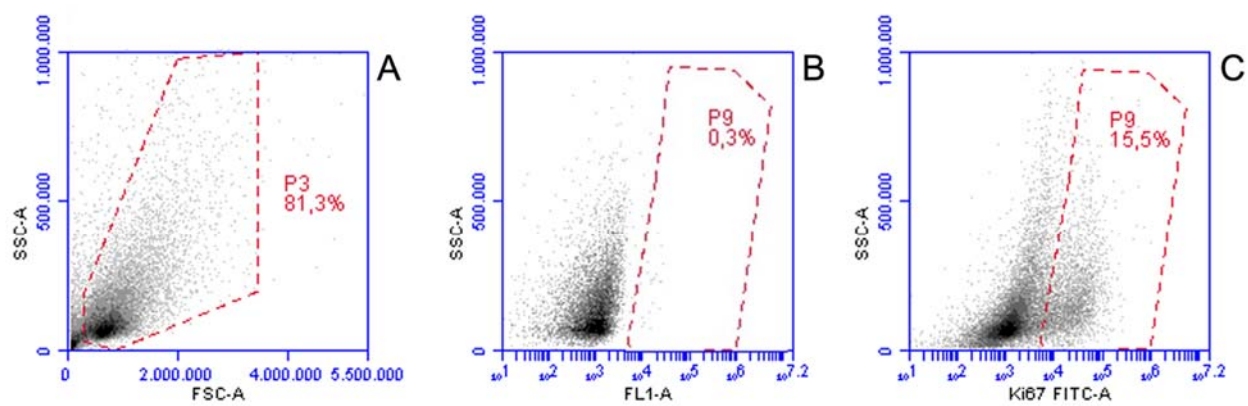

**Figure S1.** Reactive Lymph node. Ki67 analysis. (A) FSC vs SSC plot showing whole population after doublets exclusion. (B) isotype-stained tube; P3 events are displayed. (C) Ki67-stained tube; P3 events are displayed.
